# Supplementary material
Source: Preprints.org preprint supplement (doi:10.20944/preprints202107.0336.v1)
Supplement: Supplementary file 1 [file supplementary]

Color Key

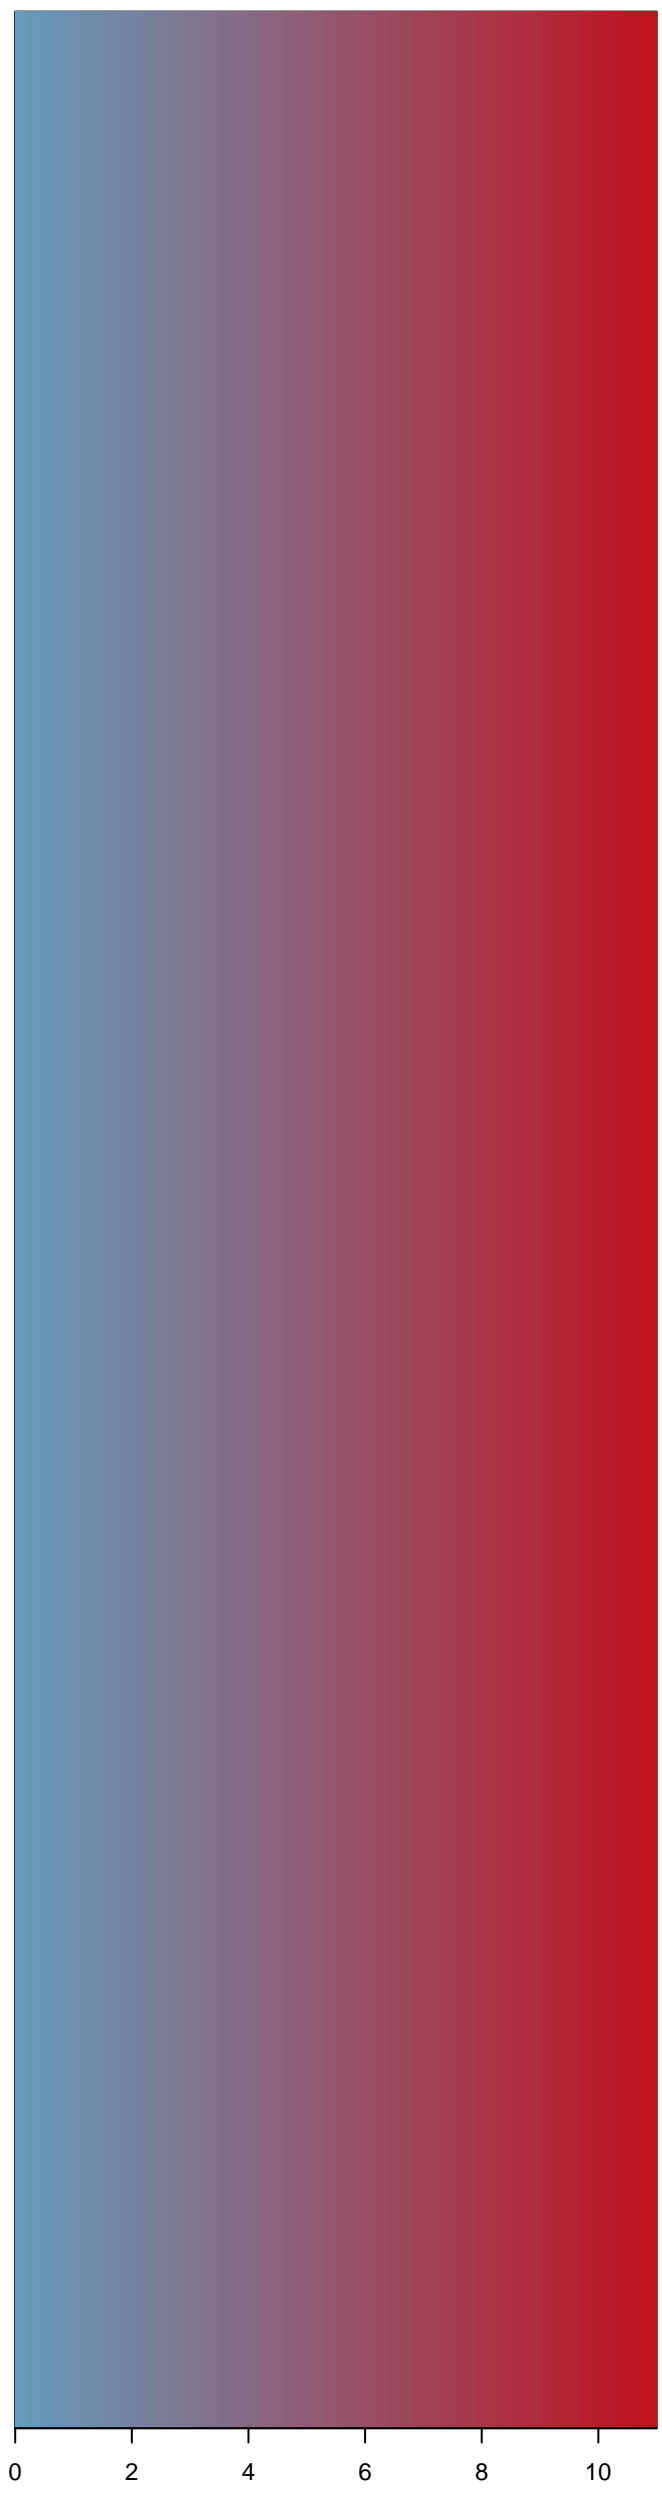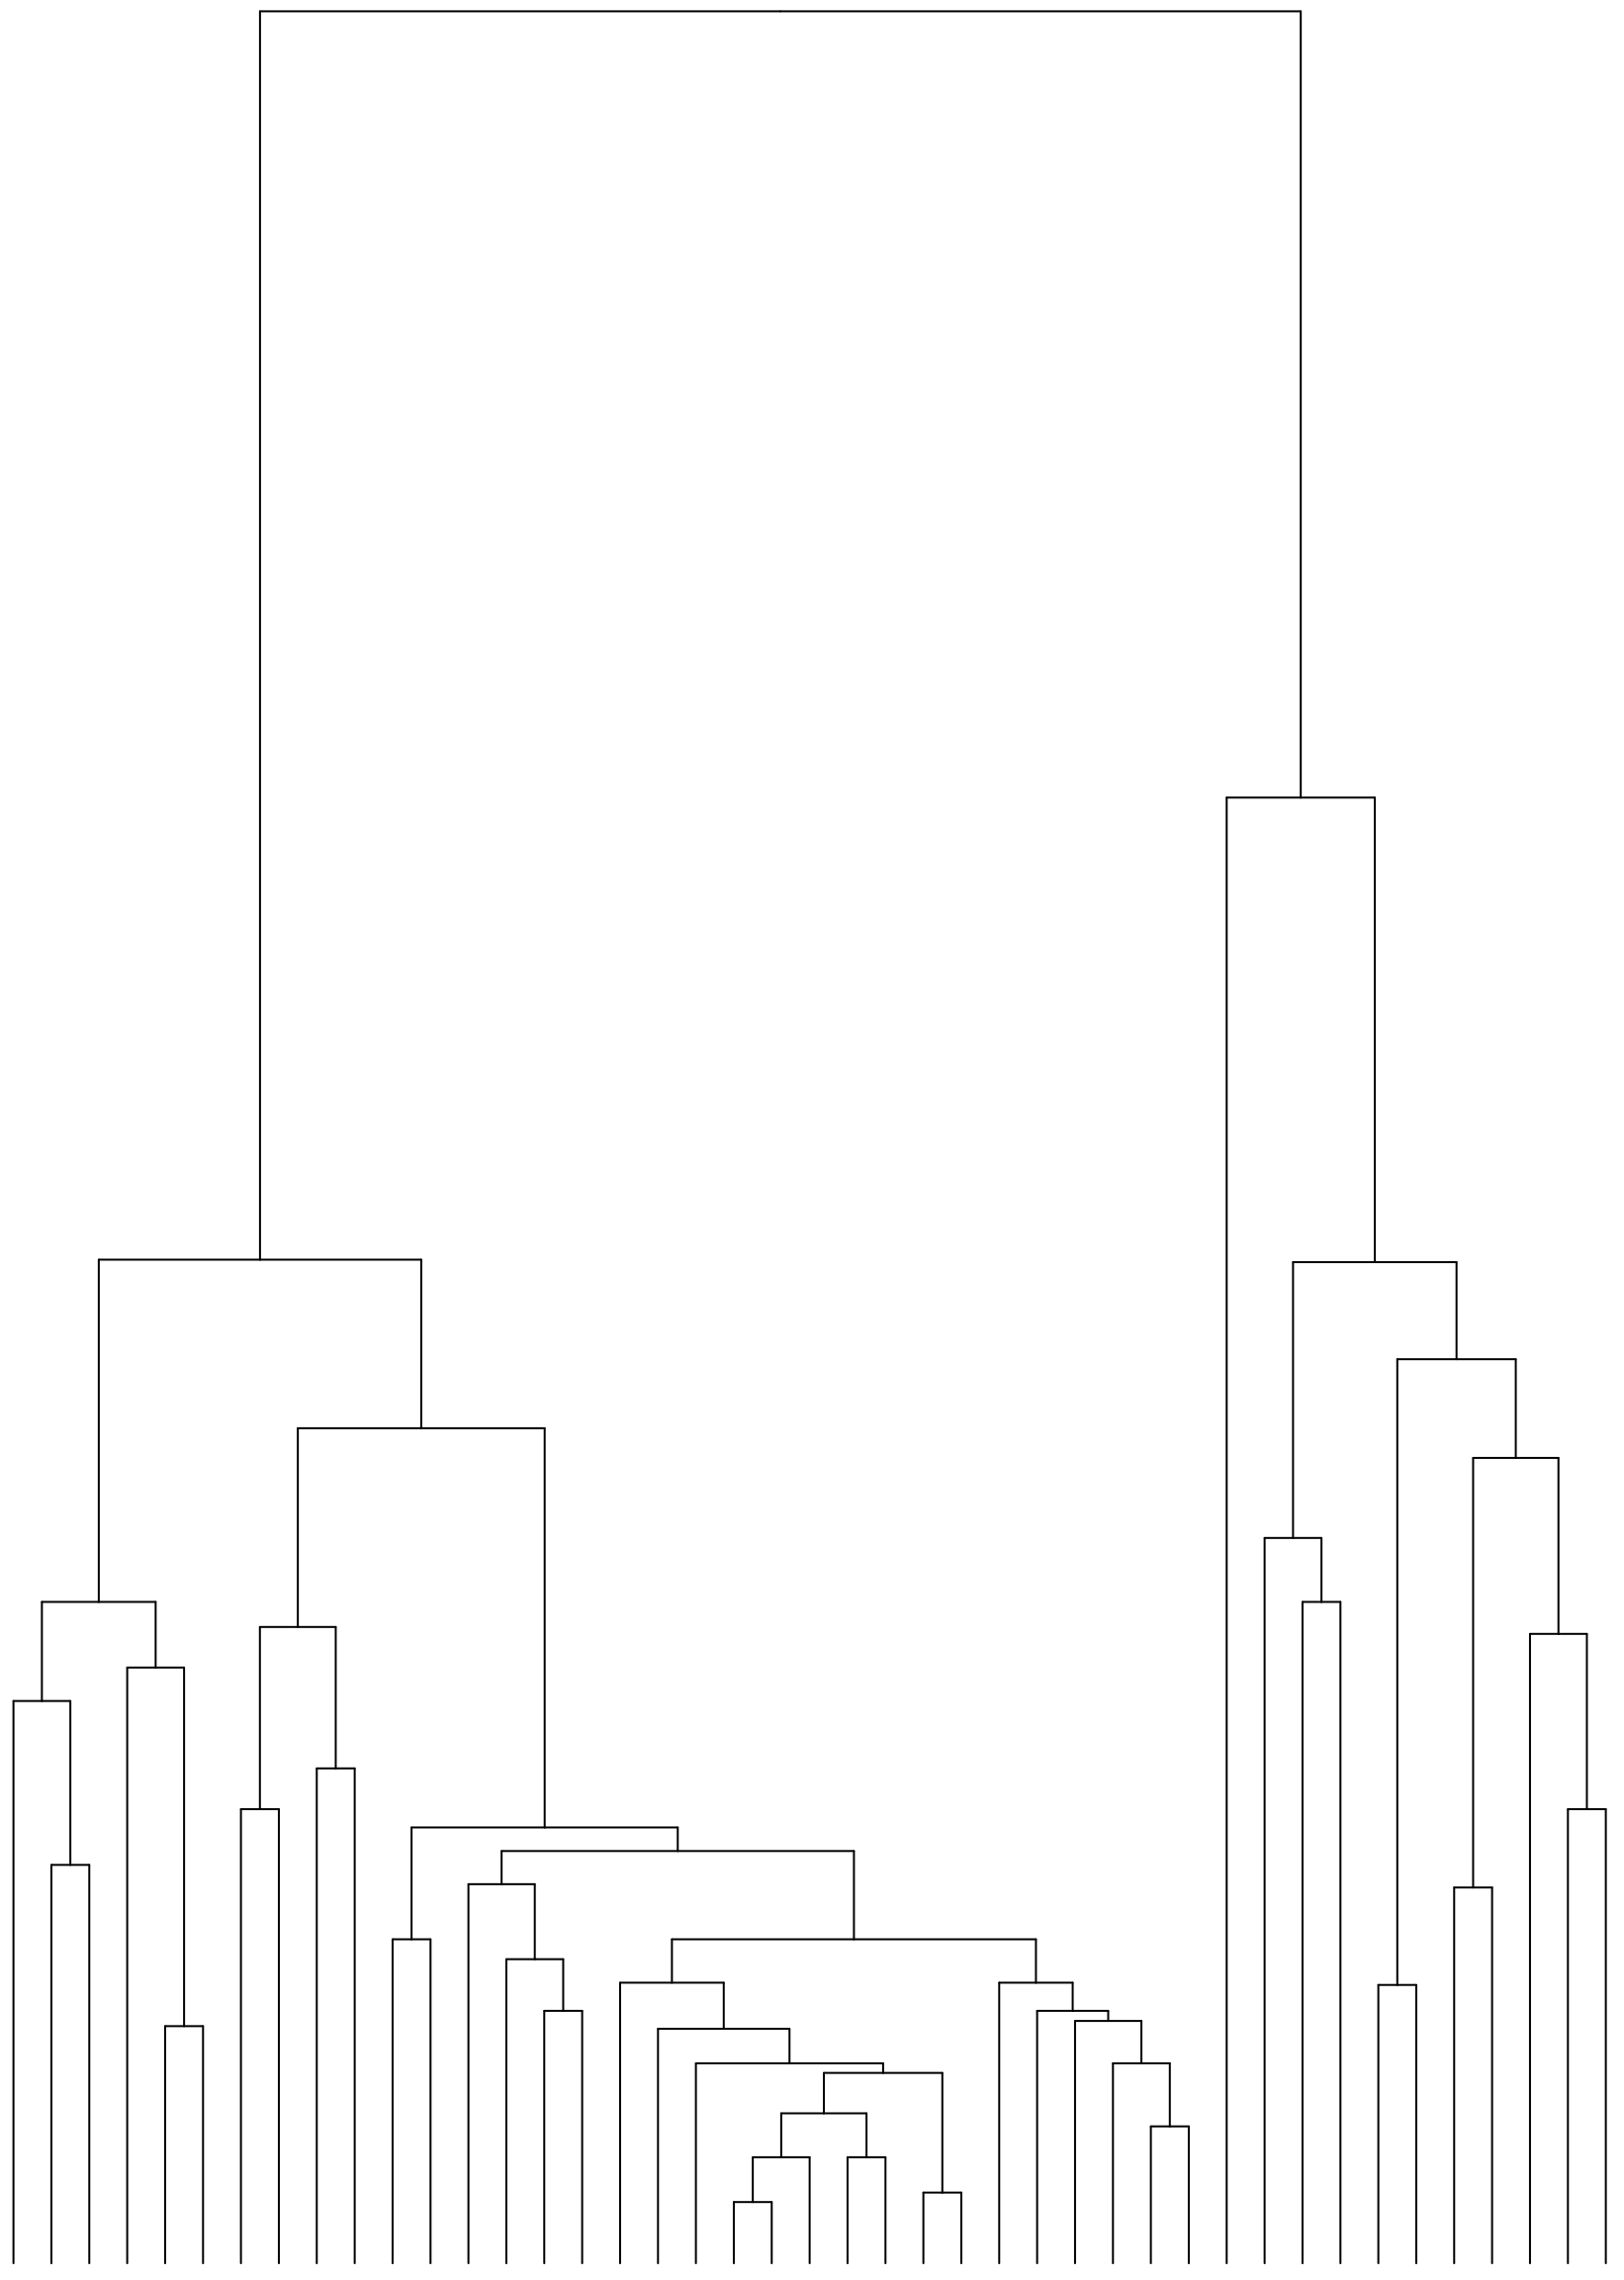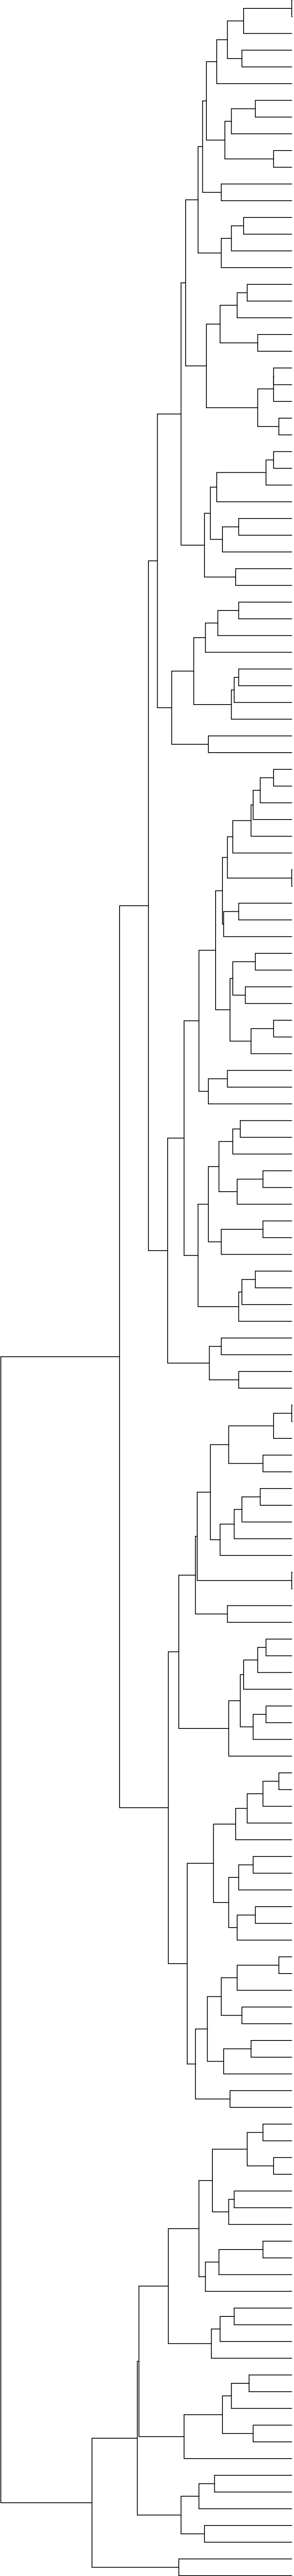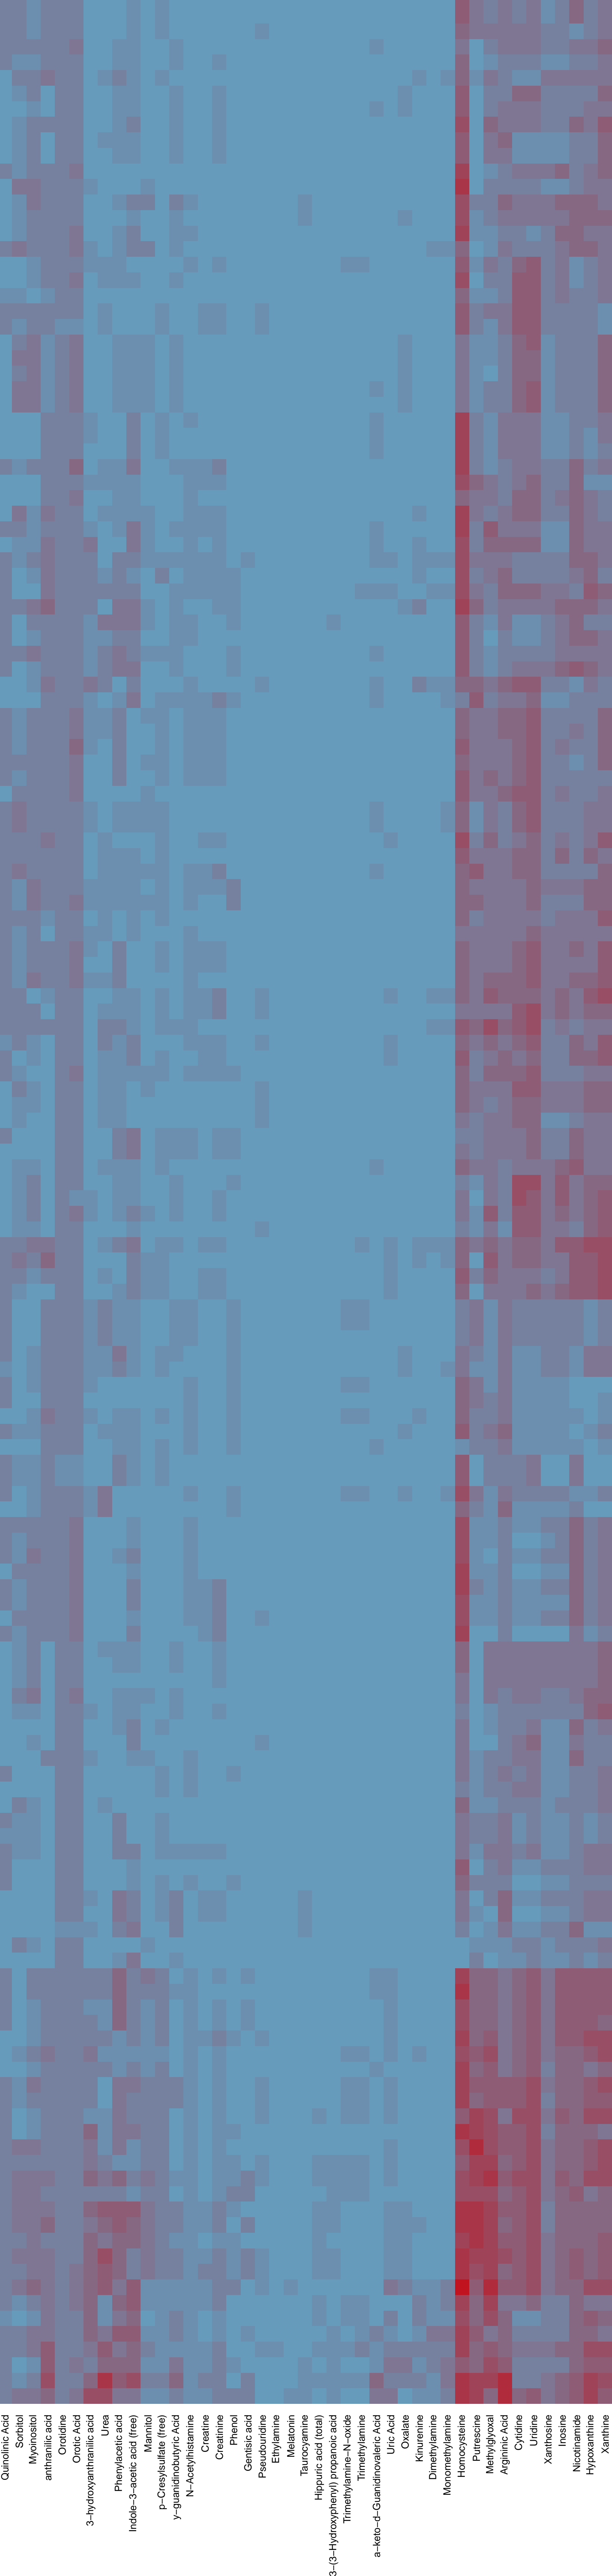

- Eubacterium rectale DSM 17629
- Eubacterium rectale
- Butyrivibrio fibrisolvens
- Enterococcus durans
- Lactobacillus ruminis
- Christensenella minuta
- Weissella paramesenteroides
- Weissella cibaria
- Lactobacillus buchneri
- Lactobacillus fermentum
- Lactobacillus fermentum IFO 3956
- Streptococcus infantarius
- Lactobacillus plantarum
- Acidomyces sp.
- Leuconostoc mesenteroides
- Bifidobacterium dentium
- Propionibacterium sp.
- Haemophilus sp.
- Streptococcus equinus
- Lactobacillus helveticus
- Roseburia intestinalis
- Roseburia intestinalis XB6B4
- Lactobacillus rhamnosus
- Lactobacillus paracasei subsp. paracasei 8700:2
- Lactobacillus rhamnosus GG
- Lactobacillus paracasei
- Lactobacillus casei
- Veillonella parvula
- Veillonella dispar
- Veillonella atypica
- Bifidobacterium longum
- Capnocytophaga sp.
- Tannerella sp.
- Selenomonas sp.
- Listeria innocua
- Listeria grayi
- Brevundimonas sp.
- Geobacter sp.
- Desulfohalobacterium hafniense
- Leifsonia sp.
- Corynebacterium ammoniagenes
- Corynebacterium sp.
- Kocuria sp.
- Micrococcus luteus
- Paenibacillus sp.
- Phascolarctobacterium faecium
- Bacteroides ovatus
- Bacteroides cellulosilyticus
- Bacteroides fragilis
- Bacteroides xylanisolvens
- Bacteroides uniformis
- Streptococcus sp.
- Erysipelotrichaceae bacterium
- Clostridium innocuum
- Ruminococcus torques
- Ruminococcus sp.
- Megamonas funiformis
- Alistipes sp.
- Alistipes indistinctus
- Blautia hansenii
- Alistipes shahii
- Bacteroides intestinalis
- Bacteroides caccae
- Parabacteroides sp.
- Clostridium sporogenes
- Clostridium perfringens
- Clostridium sp.
- Flavonifractor plautii
- Coproccoccus catus
- Bacteroides bacterium
- Faecalibacterium prausnitzii
- Faecalibacterium prausnitzii A2-165
- Faecalibacterium prausnitzii L2-6
- Fusobacterium ulcerans
- Fusobacterium varium
- Clostridium cf. saccharolyticum K10
- Lachnospiraceae bacterium
- Lactobacillus brevis
- Enterococcus faecalis
- Turicibacter sp.
- Blautia sp.
- Anaerostipes caccae
- Ruminococcus gnavus
- Clostridium scindens
- Helicobacter pylori 83
- Helicobacter pylori
- Helicobacter pylori 35A
- Desulfovibrio piger
- Desulfovibrio sp.
- Helicobacter cinaedi
- Helicobacter winhamensis
- Campylobacter coli
- Oxalobacter formigenes
- Campylobacter upsaliensis
- Coproccoccus sp. ART55/1
- Coproccoccus sp.
- Arobacter butzleri
- Helicobacter bilis
- Bifidobacterium catenulatum
- Bifidobacterium angulatum
- Bifidobacterium bifidum
- Bifidobacterium adolescentis
- Bifidobacterium longum subsp. longum JCM 1217
- Bifidobacterium breve
- Bifidobacterium pseudocatenulatum
- Bifidobacterium longum subsp. longum F8
- Lactobacillus reuteri
- Lactobacillus reuteri JCM 1112
- Lactobacillus reuteri SD2112
- Enterococcus faecium
- Pedococcus acidilactici
- Finexidia magna
- Parvimonas micro
- Ruminococcaceae bacterium
- Fusobacterium necrophorum subsp. funduliforme
- Fusobacterium gonidialiformans
- Lactobacillus acidophilus
- Eubacterium siraeum
- Eubacterium siraeum V10Sc8a
- Fusobacterium mortiferum
- Collinsella aerofaciens
- Fusobacterium nucleatum
- Eggerthella lenta
- Adlercreutzia equofaciens
- Gordonibacter pamelaeae
- Lactobacillus amyolyticus
- Dialister pneumosintes
- Providencia rettgeri
- Providencia stuartii
- Providencia rustigianii
- Providencia alcalifaciens
- Morganella morganii
- Edwardsiella tarda
- Proteus mirabilis
- Aeromonas hydrophila
- Aeromonas veronii
- Hafnia alvei
- Enterobacter cancerogenus
- Yokenella regensburgei
- Escherichia sp.
- Escherichia coli
- Citrobacter youngae
- Klebsiella pneumoniae
- Raoultella ornithinolytica
- Enterobacter cloacae
- Klebsiella oxytoca
- Klebsiella sp.
- Paenibacillus sp.
- Flavobacteriaceae bacterium
- Stenotrophomonas sp.
- Sphingomonas sp.
- Rhizobium sp.
- Methylobacterium sp.
- Pseudomonas sp.
- Streptomyces sp.
