# Supplementary material
Source: Preprints.org preprint supplement (doi:10.20944/preprints202107.0336.v1)
Supplement: Supplementary file 1 [file supplementary]

## Sheet: bac_tox_species_12072021.tab
species	metabolism (KEGG)	synthesis (KEGG)	metabolism only (KEGG)	synthesis only (KEGG)	metabolism only (KEGG modules + Metacyc)	synthesis only (KEGG modules + Metacyc)
Oxalobacter formigenes	8	20	3	15	2	9
Stenotrophomonas sp.	19	27	5	13	5	8
Campylobacter coli	8	20	4	16	2	8
Brevundimonas sp.	17	29	4	16	1	8
Campylobacter upsaliensis	5	19	1	15	2	7
Escherichia sp.	22	26	7	11	6	6
Rhizobium sp.	29	34	6	11	6	6
Desulfovibrio sp.	10	21	4	15	3	6
Methylobacterium sp.	23	31	5	13	3	6
Dialister pneumosintes	5	13	2	10	3	6
Helicobacter pylori	11	20	5	14	2	6
Desulfovibrio piger	11	22	3	14	2	6
Edwardsiella tarda	16	25	4	13	2	6
Morganella morganii	17	24	4	11	1	6
Gordonibacter pamelaeae	8	15	3	10	1	6
Geobacter sp.	16	24	3	11		6
Pediococcus acidilactici	11	9	11	9	6	5
Lactobacillus fermentum	10	14	6	10	5	5
Corynebacterium ammoniagenes	17	20	6	9	4	5
Desulfitobacterium hafniense	18	25	5	12	2	5
Paenisporosarcina sp.	13	22	3	12	2	5
Paenibacillus sp.	25	30	6	11	2	5
Christensenella minuta	12	20	3	11	2	5
Aeromonas veronii	20	25	5	10	2	5
Propionibacterium sp.	14	20	4	10	2	5
Helicobacter bilis	8	14	3	9	2	5
Phascolarctobacterium faecium	12	22	4	14	1	5
Lachnospiraceae bacterium	9	17	3	11	1	5
Helicobacter cinaedi	9	15	4	10	1	5
Clostridium sp.	14	25	1	12		5
Eggerthella lenta	10	18	3	11		5
Coprococcus catus	15	21	2	8		5
Lactobacillus ruminis	11	14	7	10	6	4
Lactobacillus paracasei	13	17	6	10	5	4
Lactobacillus casei	13	16	6	9	5	4
Lactobacillus rhamnosus	13	17	5	9	5	4
Clostridium sporogenes	18	20	7	9	4	4
Sphingomonas sp.	26	29	6	9	4	4
Hafnia alvei	21	24	6	9	4	4
Escherichia coli	27	28	7	8	4	4
Bacteroidales bacterium	14	20	5	11	3	4
Enterococcus durans	10	17	4	11	3	4
Corynebacterium sp.	12	16	6	10	3	4
Blautia sp.	20	26	4	10	3	4
Megamonas hypermegale	15	22	3	10	3	4
Weissella paramesenteroides	11	16	4	9	3	4
Blautia hansenii	12	18	3	9	3	4
Alistipes indistinctus	14	23	3	12	2	4
Bifidobacterium pseudocatenulatum	11	17	5	11	2	4
Leuconostoc mesenteroides	10	18	3	11	2	4
Lactobacillus buchneri	10	16	4	10	2	4
Enterobacter cancerogenus	16	23	3	10	2	4
Streptomyces sp.	29	32	6	9	2	4
Aeromonas hydrophila	21	25	5	9	2	4
Lactobacillus brevis	11	16	4	9	2	4
Weissella cibaria	11	17	3	9	2	4
Helicobacter winghamensis	7	15	1	9	2	4
Bifidobacterium longum	12	21	4	13	1	4
Proteus mirabilis	14	22	3	11	1	4
Clostridium innocuum	15	20	5	10	1	4
Erysipelotrichaceae bacterium	15	20	5	10	1	4
Lactobacillus reuteri	11	17	3	9	1	4
Collinsella aerofaciens	8	14	1	7	1	4
Bifidobacterium dentium	9	19	2	12		4
Bifidobacterium bifidum	10	18	2	10		4
Bifidobacterium catenulatum	10	18	2	10		4
Streptococcus equinus	10	17	2	9		4
Providencia alcalifaciens	17	22	5	10	4	3
Providencia rustigianii	17	22	5	10	4	3
Enterobacter cloacae	22	26	5	9	4	3
Listeria grayi	16	16	8	8	4	3
Kocuria sp.	19	21	6	8	4	3
Lactobacillus acidophilus	10	13	4	7	4	3
Pseudomonas sp.	35	34	6	5	4	3
Listeria innocua	16	18	9	11	3	3
Bifidobacterium breve	11	16	6	11	3	3
Ruminococcus gnavus	16	21	4	9	3	3
Fusobacterium nucleatum	9	12	5	8	3	3
Enterococcus faecalis	15	15	7	7	3	3
Enterococcus faecium	12	13	6	7	3	3
Leifsonia sp.	21	22	5	6	3	3
Fusobacterium mortiferum	12	18	6	12	2	3
Alistipes sp.	15	23	4	12	2	3
Arcobacter butzleri	15	20	5	10	2	3
Veillonella atypica	8	17	1	10	2	3
Citrobacter youngae	22	26	5	9	2	3
Adlercreutzia equolifaciens	9	13	5	9	2	3
Flavonifractor plautii	16	22	3	9	2	3
Fusobacterium ulcerans	13	19	3	9	2	3
Fusobacterium varium	12	18	3	9	2	3
Roseburia intestinalis	15	19	4	8	2	3
Micrococcus luteus	16	19	4	7	2	3
Yokenella regensburgei	20	24	3	7	2	3
Bacteroides ovatus	15	22	4	11	1	3
Veillonella parvula	9	17	3	11	1	3
Veillonella dispar	9	17	2	10	1	3
Haemophilus sp.	14	17	6	9	1	3
Alistipes shahii	12	19	2	9	1	3
Ruminococcus torques	16	21	2	7	1	3
Clostridium scindens	16	18	4	6	1	3
Bacteroides cellulosilyticus	14	22	3	11		3
Anaerostipes caccae	18	20	3	5		3
Flavobacteriaceae bacterium	21	28	6	13	5	2
Klebsiella sp.	27	28	7	8	5	2
Lactobacillus amylolyticus	10	10	6	6	5	2
Klebsiella oxytoca	26	28	7	9	4	2
Lactobacillus helveticus	10	13	4	7	4	2
Clostridium perfringens	15	21	4	10	3	2
Raoultella ornithinolytica	25	28	6	9	3	2
Klebsiella pneumoniae	25	27	6	8	3	2
Capnocytophaga sp.	14	17	5	8	3	2
Turicibacter sp.	11	14	4	7	3	2
Megamonas funiformis	16	23	4	11	2	2
Selenomonas sp.	15	21	4	10	2	2
Bifidobacterium angulatum	9	14	4	9	2	2
Eubacterium siraeum	11	14	5	8	2	2
Bifidobacterium adolescentis	9	13	4	8	2	2
Ruminococcus sp.	14	20	2	8	2	2
Fusobacterium necrophorum	11	13	5	7	2	2
Faecalibacterium prausnitzii	13	17	3	7	2	2
Coprococcus sp.	9	14	2	7	2	2
Actinomyces sp.	13	21	2	10	1	2
Clostridium cf.	11	20	1	10	1	2
Providencia stuartii	18	24	3	9	1	2
Bacteroides xylanisolvens	15	21	3	9	1	2
Butyrivibrio fibrisolvens	13	19	2	8	1	2
Streptococcus infantarius	10	15	2	7	1	2
Streptococcus sp.	12	16	2	6	1	2
Streptococcus anginosus	10	12	3	5	1	2
Bacteroides fragilis	14	21	3	10		2
Bacteroides intestinalis	14	21	3	10		2
Bacteroides caccae	13	21	2	10		2
Bacteroides uniformis	13	21	2	10		2
Parabacteroides sp.	14	20	2	8		2
Providencia rettgeri	20	23	5	8	3	1
Finegoldia magna	10	10	6	6	3	1
Fusobacterium gonidiaformans	10	10	6	6	3	1
Lactobacillus plantarum	13	12	6	5	3	1
Parvimonas micra	11	8	7	4	3	1
Eubacterium rectale	12	17	3	8	2	1
Ruminococcaceae bacterium	13	12	7	6	2	1
Tannerella sp.	12	15	3	6	2	1
Eggerthella sp.	10	13	5	8	1	1
